# Supplementary material for: Pyrene based conjugated materials: synthesis, characterization and electroluminescent properties
Source: Royal Society of Chemistry journal article supplement (doi:10.1039/c4cp03693j), 2014-09-26
Supplement: c4cp03693j1.pdf [file c4cp03693j1.pdf]

## **Supporting Information**

### **Pyrene Based Conjugated Materials: Synthesis, and Characterization and Electroluminescent Properties**

#### **Table of Contents:**

1.  $^1\text{H}$  and  $^{13}\text{C}$  NMR spectra of j-1, j-2 and j-3
2.  $^1\text{H}$  and  $^{13}\text{C}$  NMR spectra of compounds PY-1, PY-2, PY-3.
3. MALDI-TOF spectra and TGA thermograms of PY-1, PY-2, PY-3.
4. Electroluminescent quantum yield (ELQY) of PY-1, PY-2 and PY-3 based OLED devices.

j-1(a)

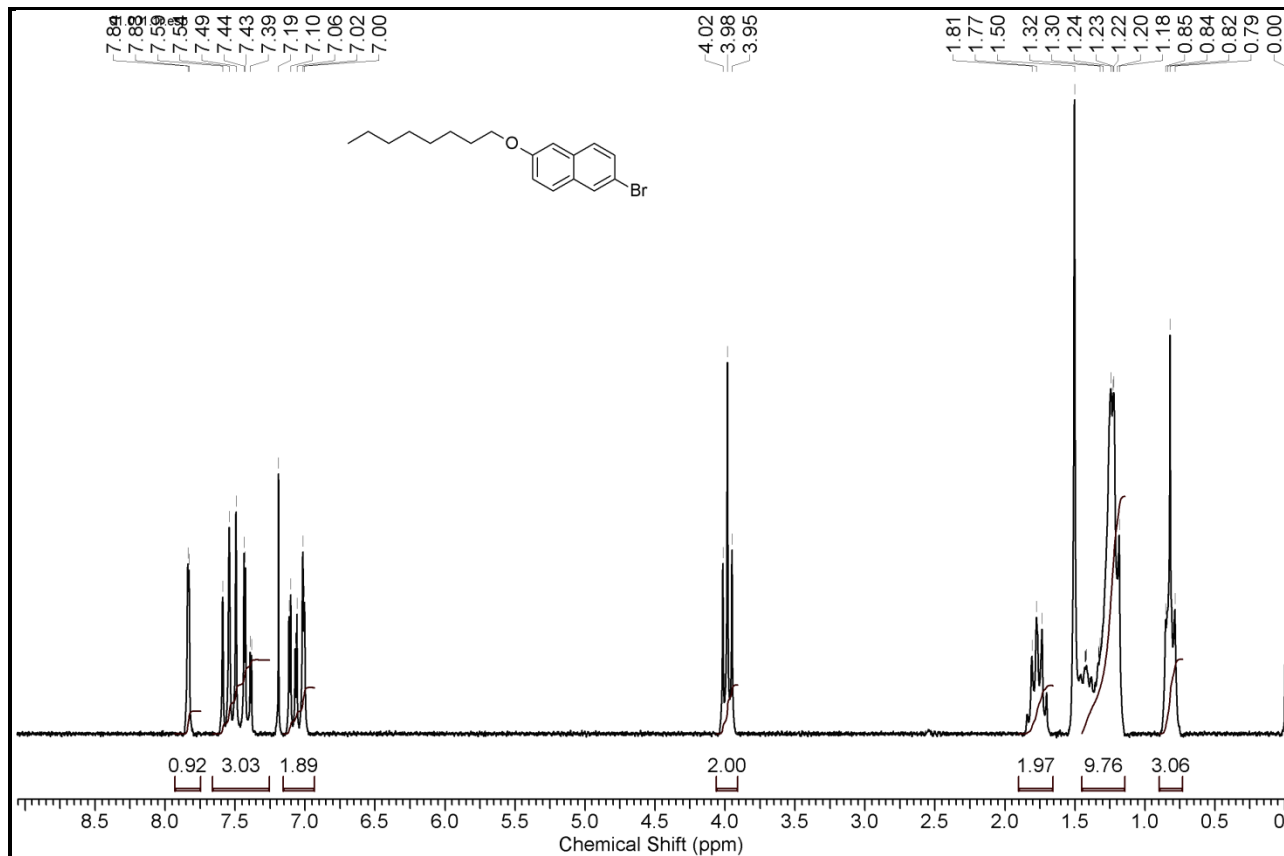

j-1 (b)

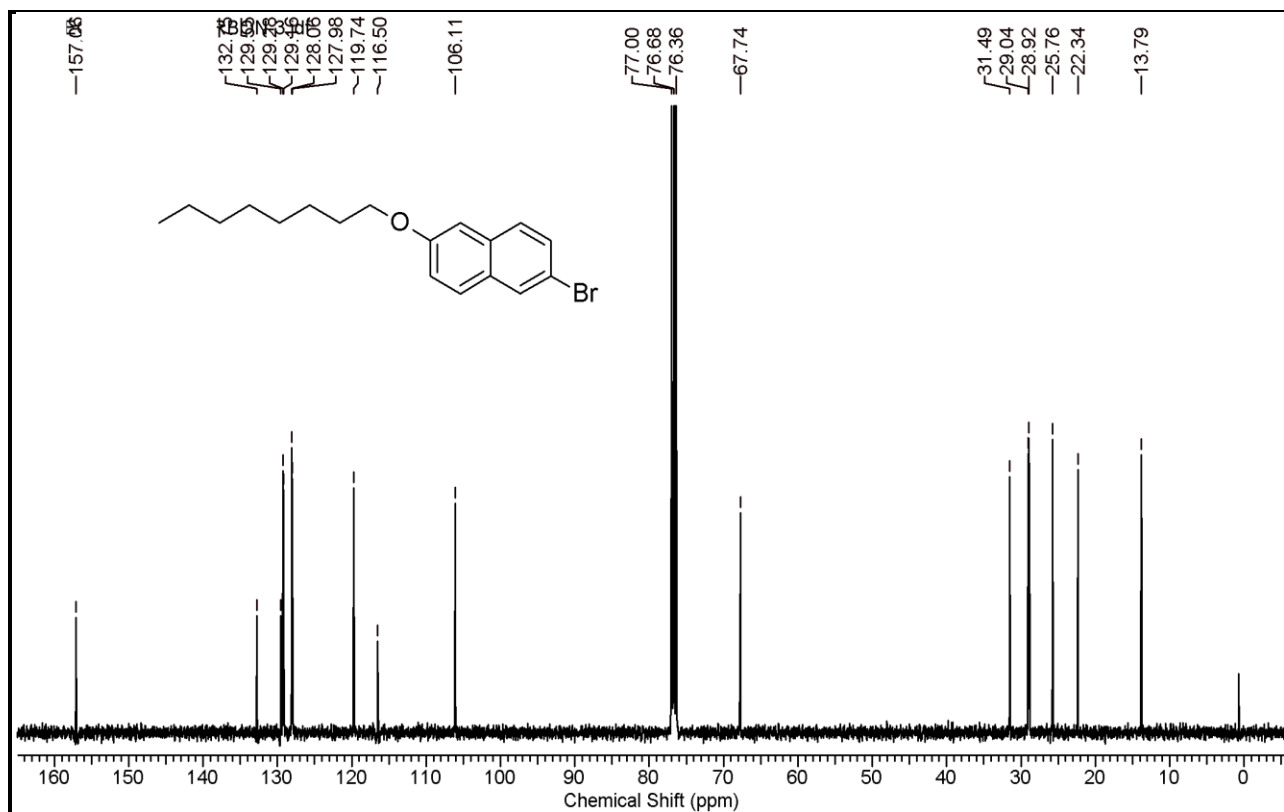

Figure S1 (a) <sup>1</sup>H and (b) <sup>13</sup>C NMR spectra of j-<sub>2</sub>(1).

j-2 (a)

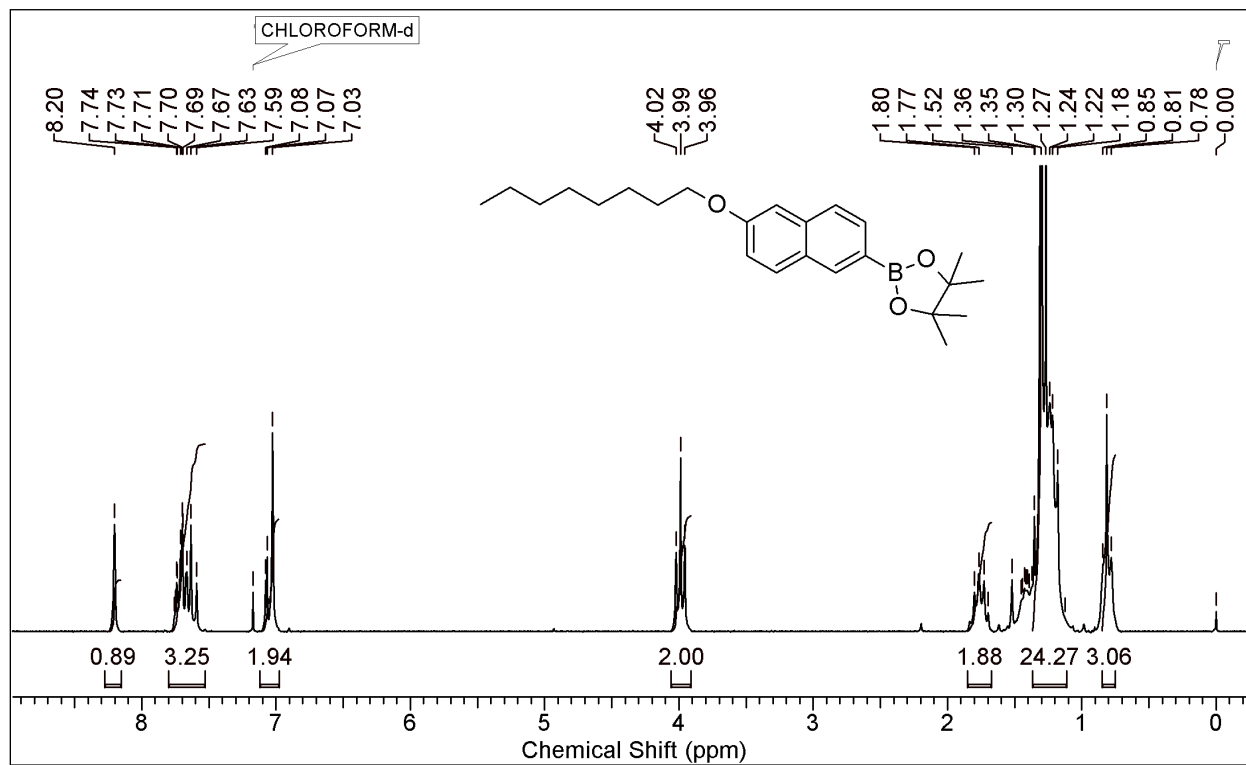

j-2 (b)

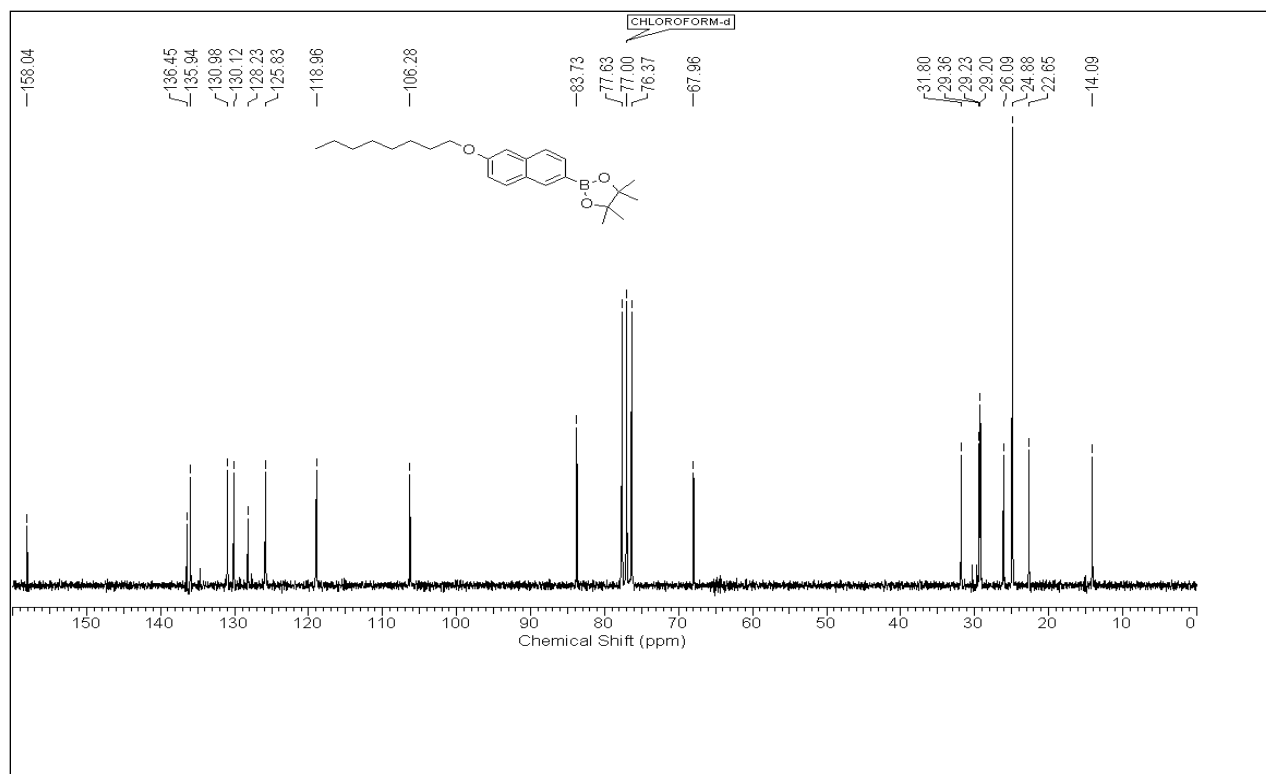

Figure S2 (a)  $^1\text{H}$  and (b)  $^{13}\text{C}$  NMR spectra of j-(2).

j-3 (a)

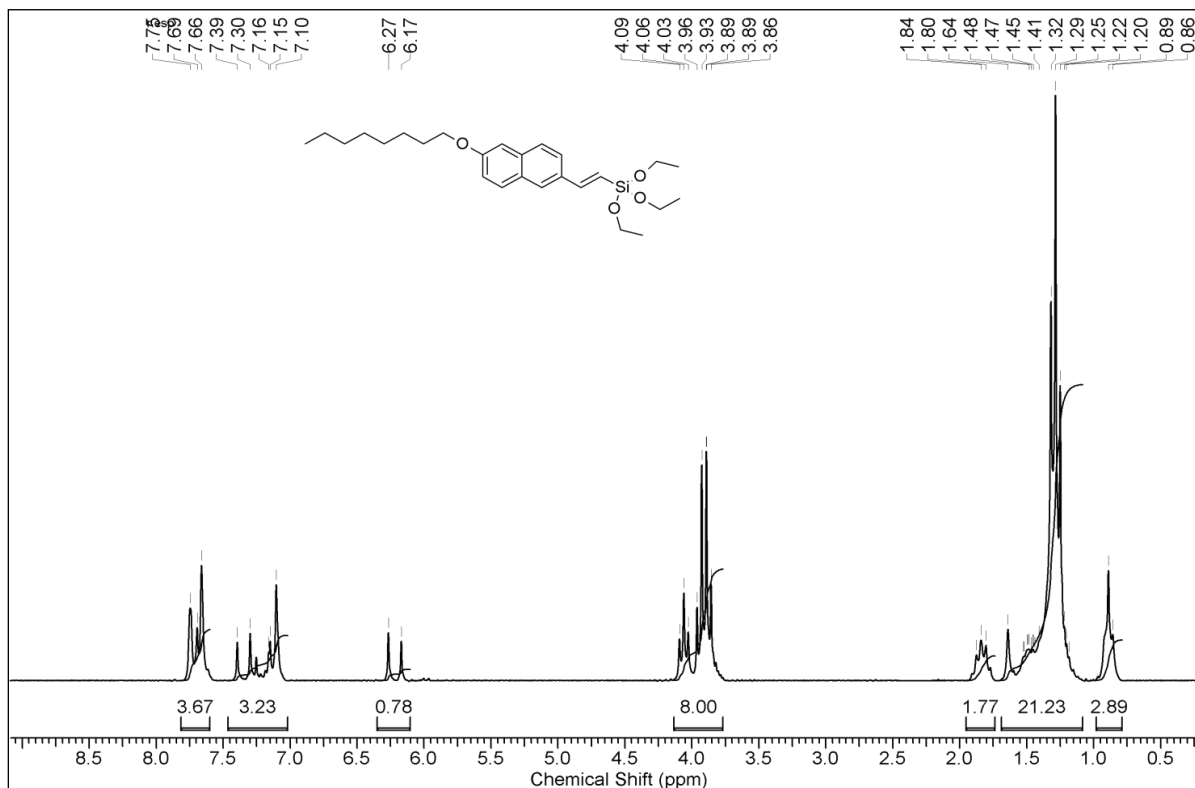

j-3 (b)

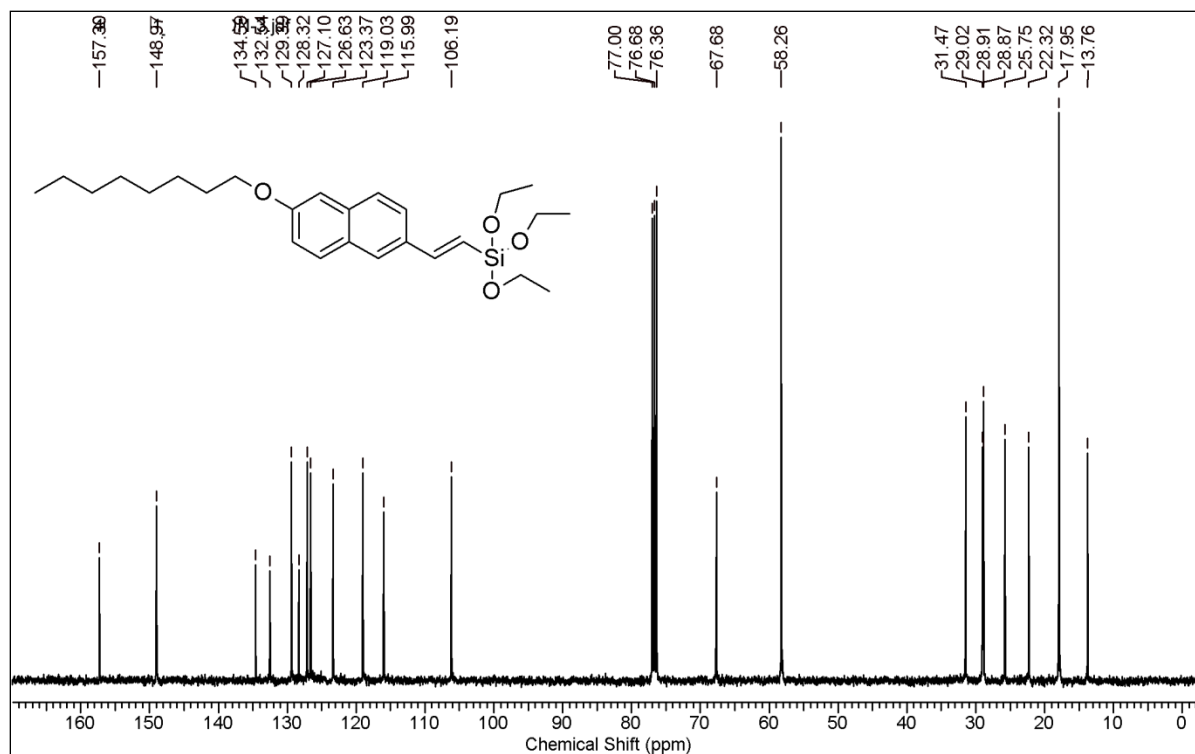

Figure S3 (a) <sup>1</sup>H and (b) <sup>13</sup>C NMR spectra of j-(3).

**PY-1(a)**

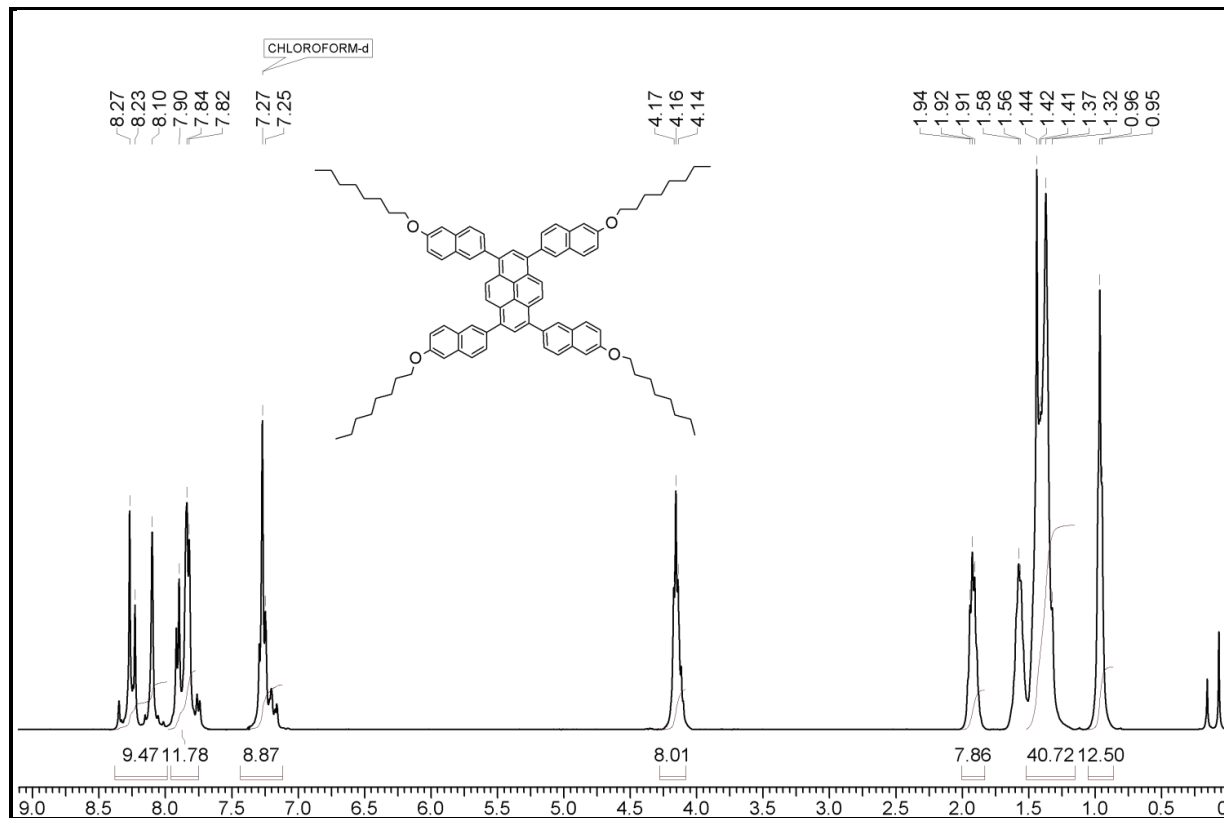

**PY-1(b)**

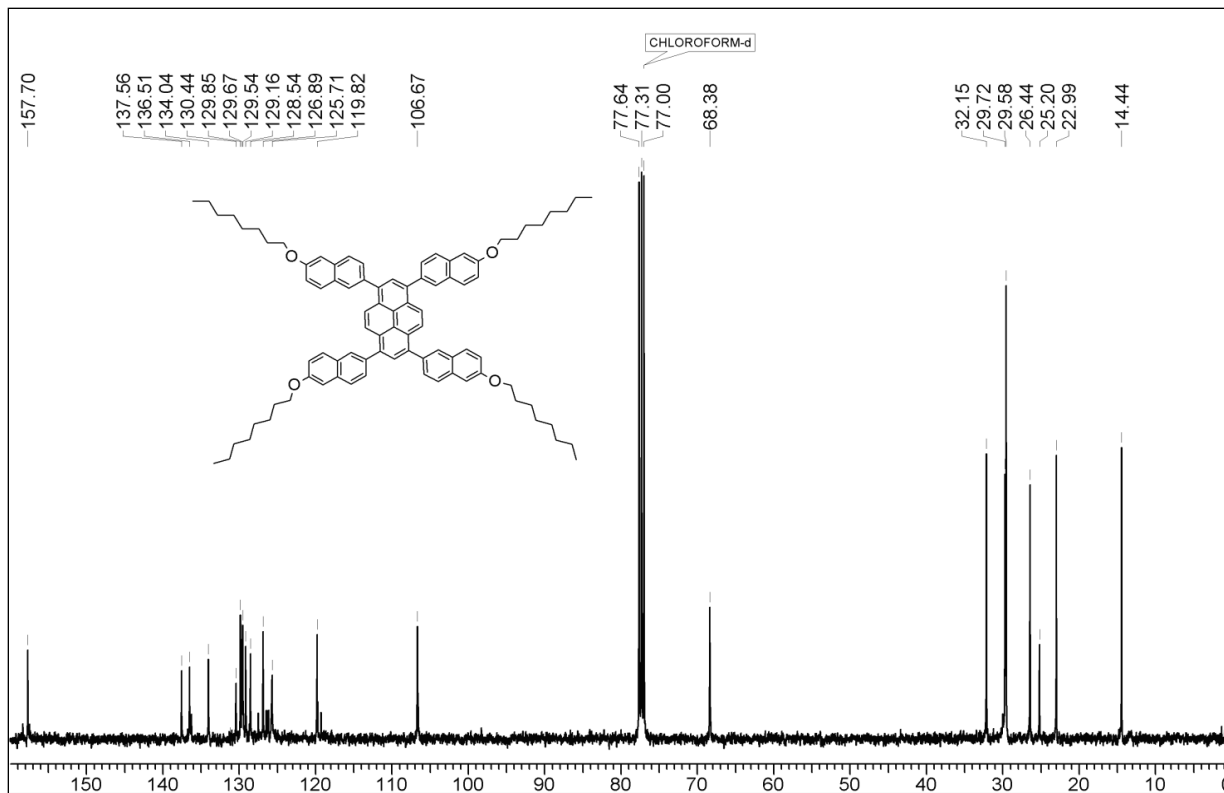

Figure S4 (a)  $^1\text{H}$  and (b)  $^{13}\text{C}$  NMR spectra of **PY-1**.

PY-2(a)

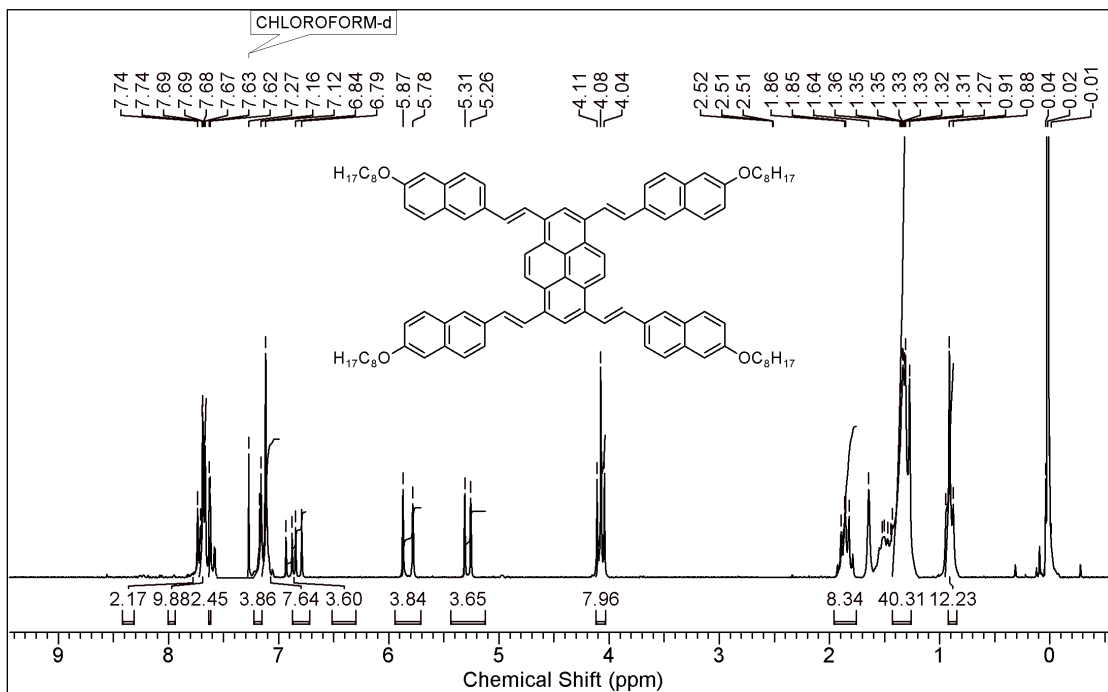

PY-2(b)

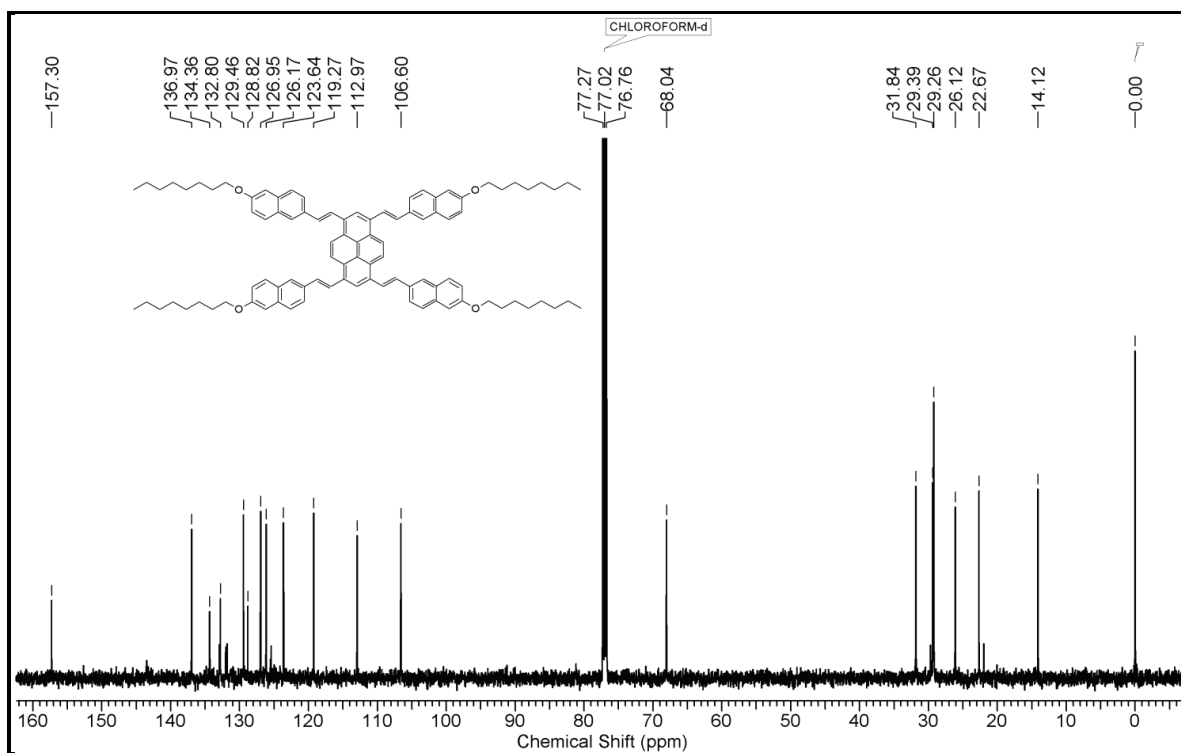

Figure S5 (a) <sup>1</sup>H and (b) <sup>13</sup>C NMR spectra of PY-2.

**PY-3(a)**

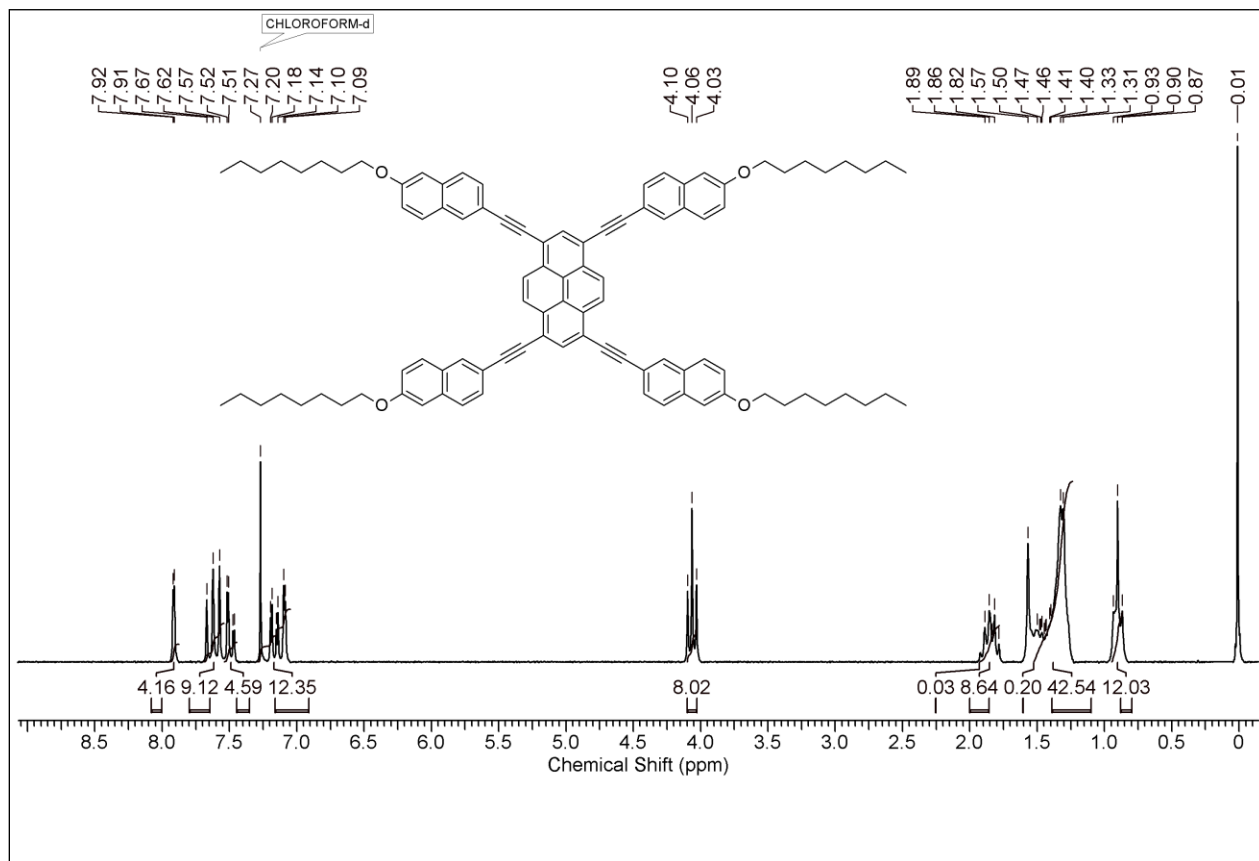

**PY-3 (b)**

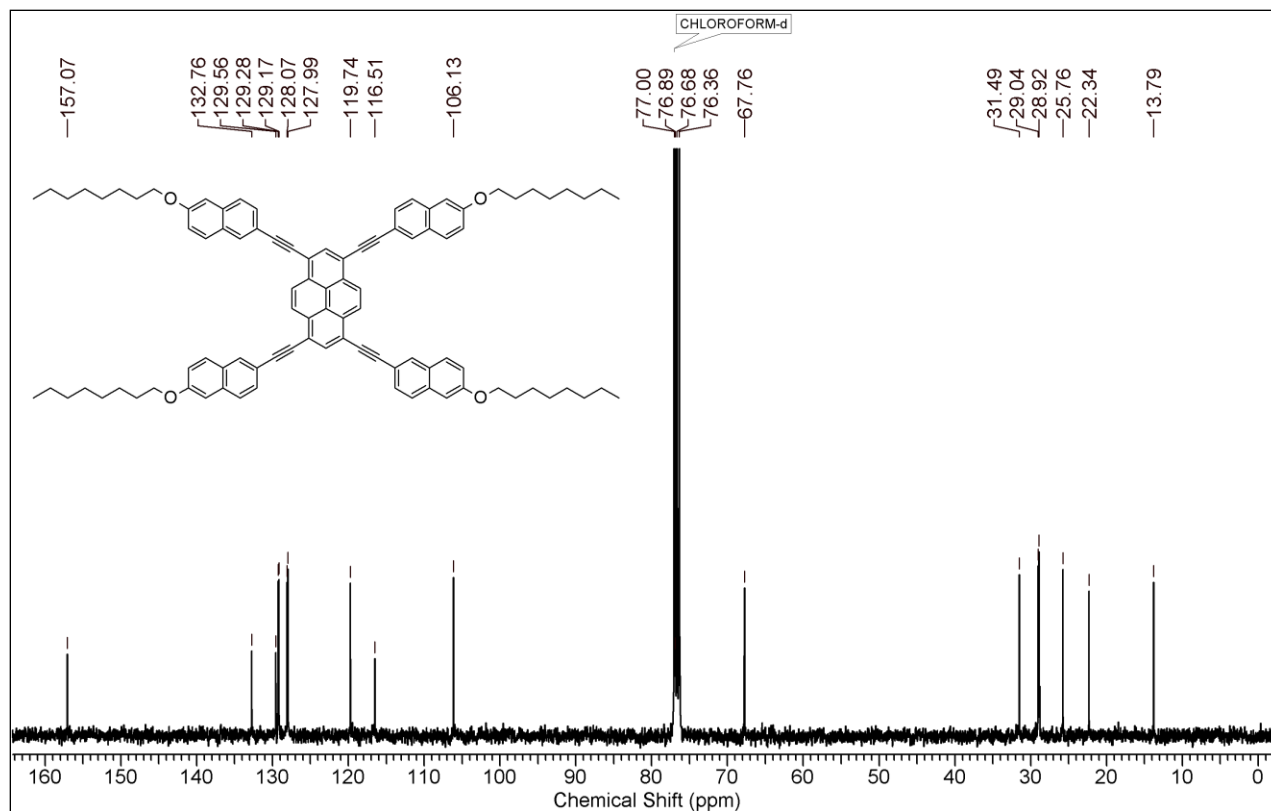

Figure S6 (a)  $^1\text{H}$  and (b)  $^{13}\text{C}$  NMR spectra of **PY-73**.

PY-1

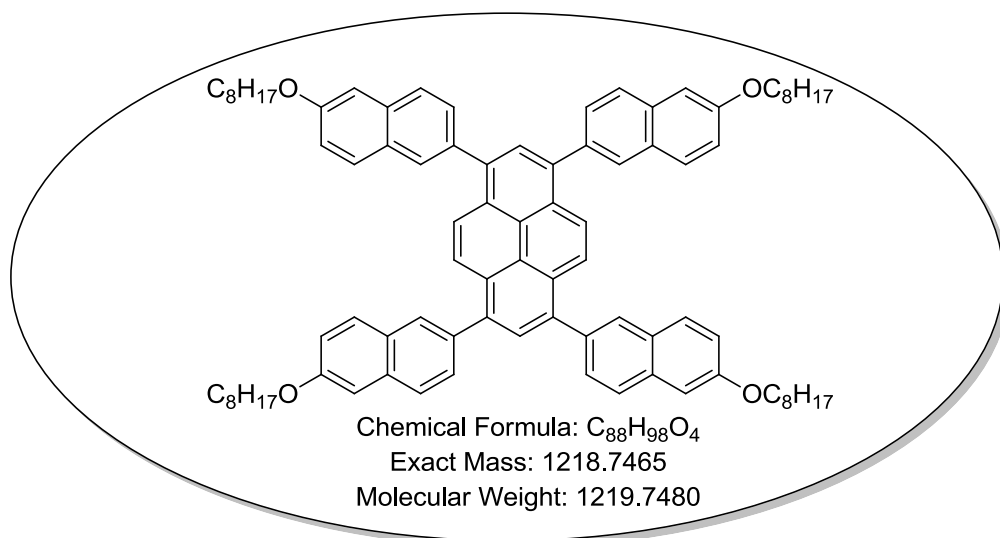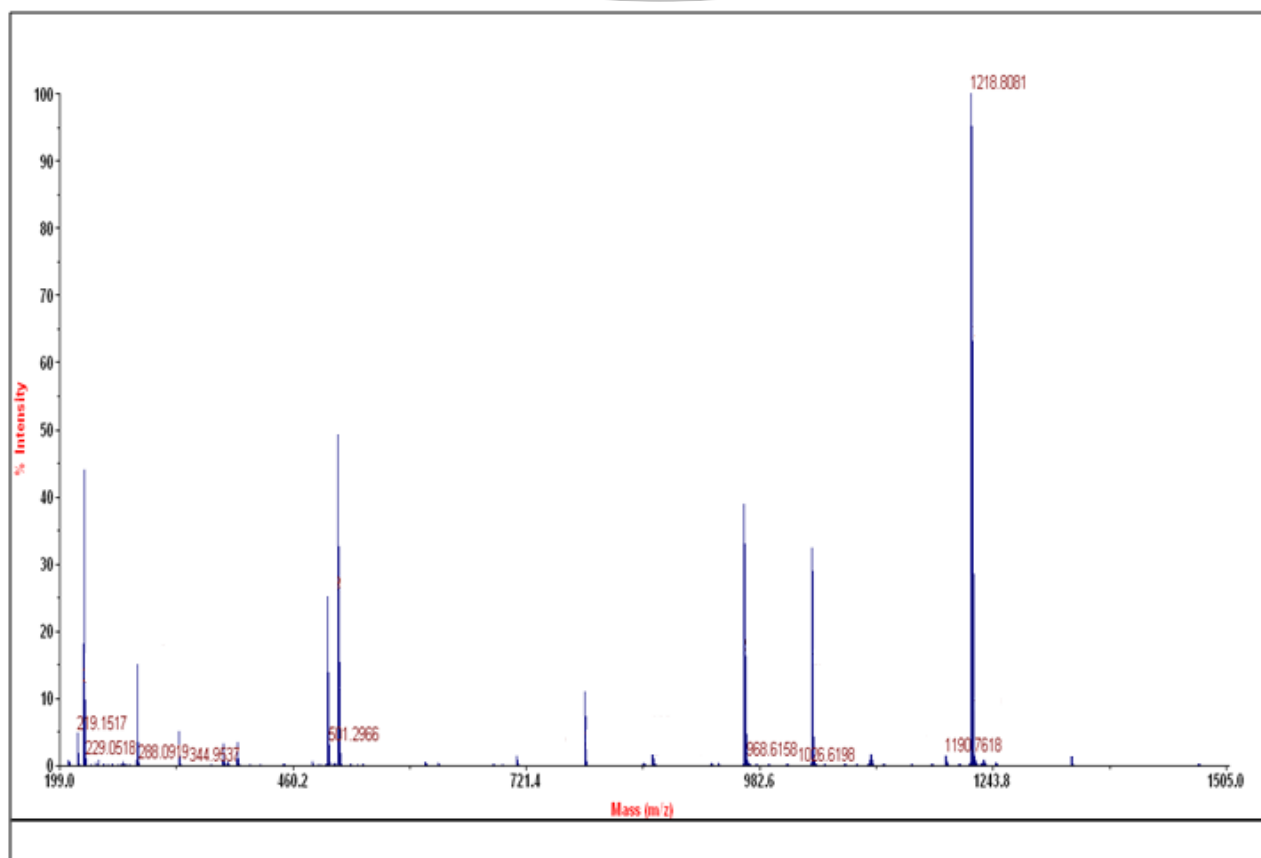



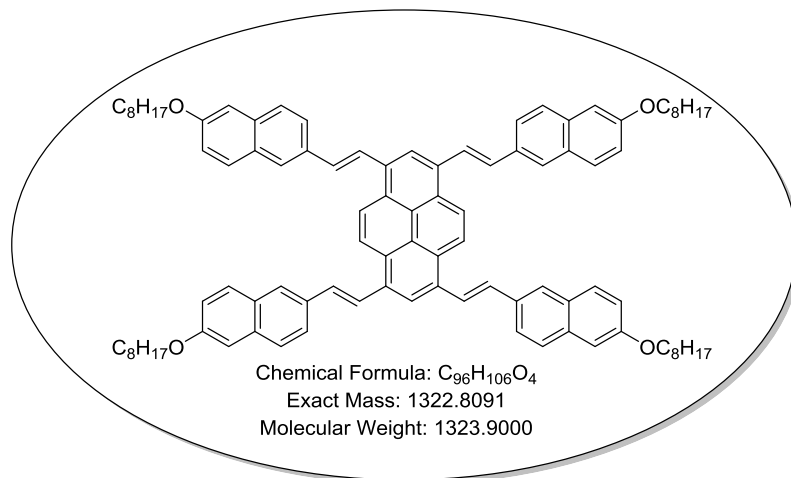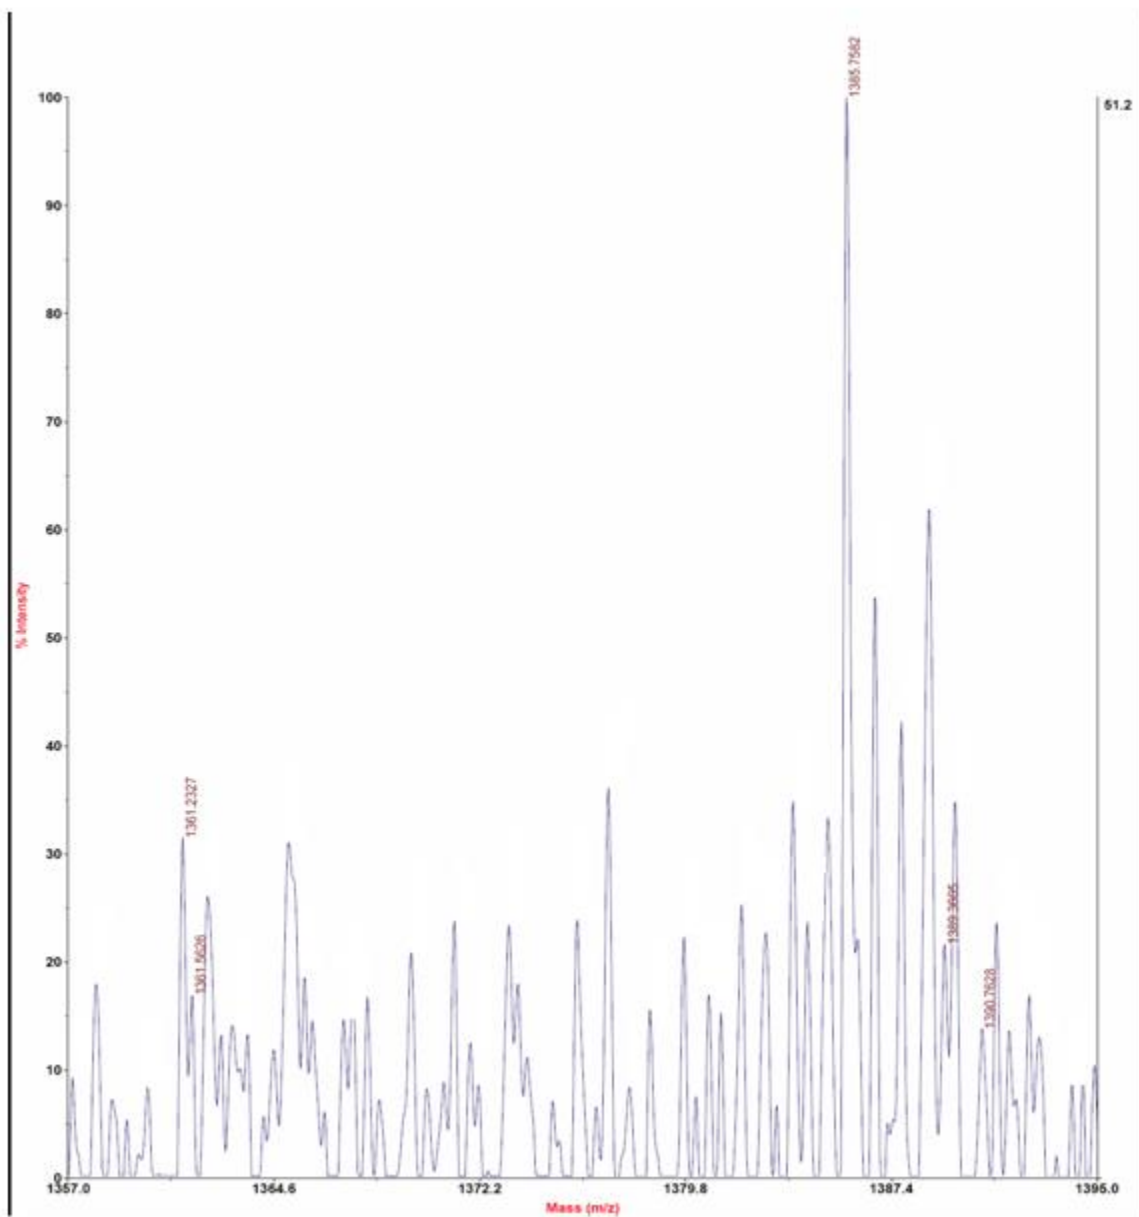

PY-3

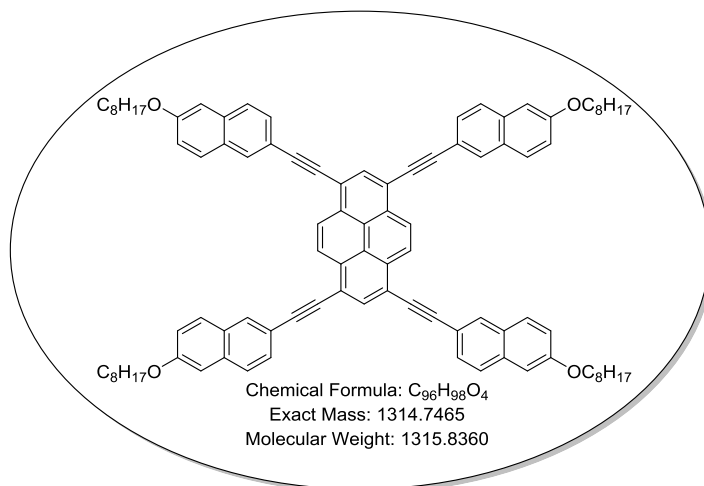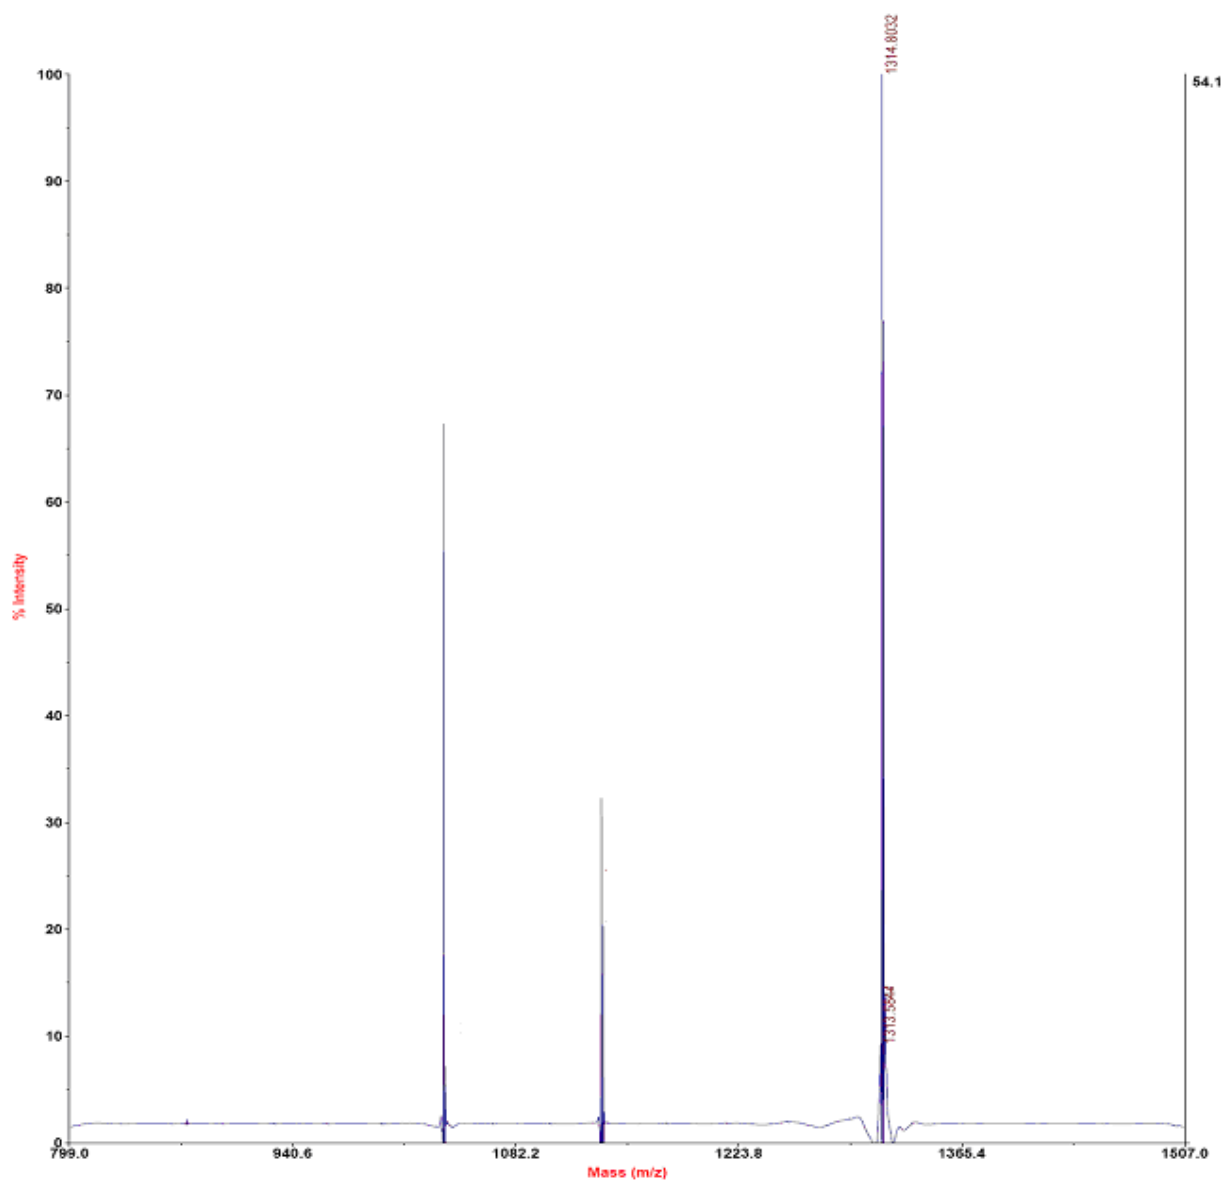

Figure S7. MALDI-TOF spectrum of PY-1, PY-2 and PY-3.

**TGA (PY-1)**

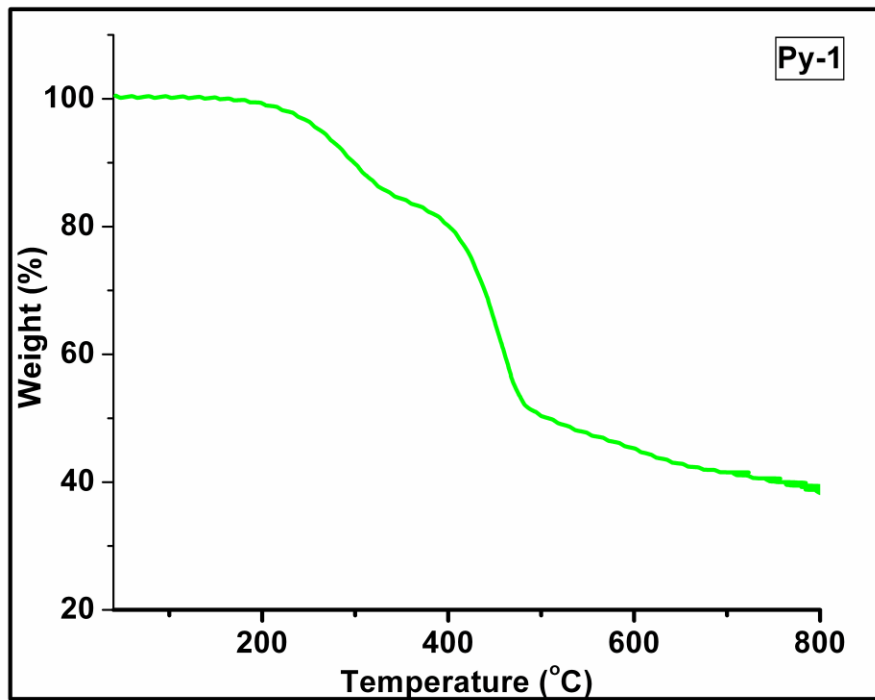

**TGA (PY-2)**

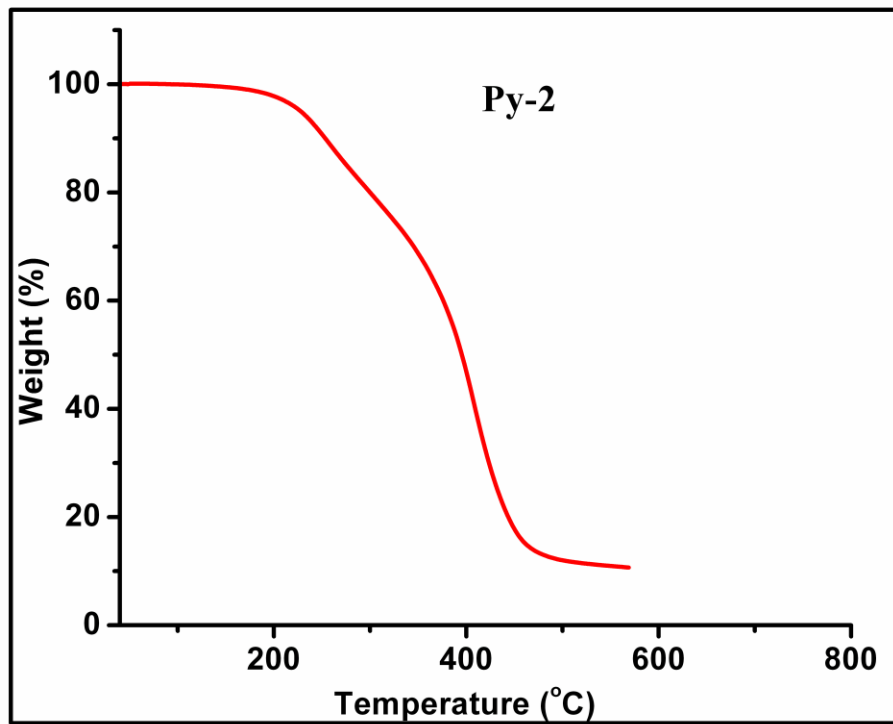

## TGA (PY-3)

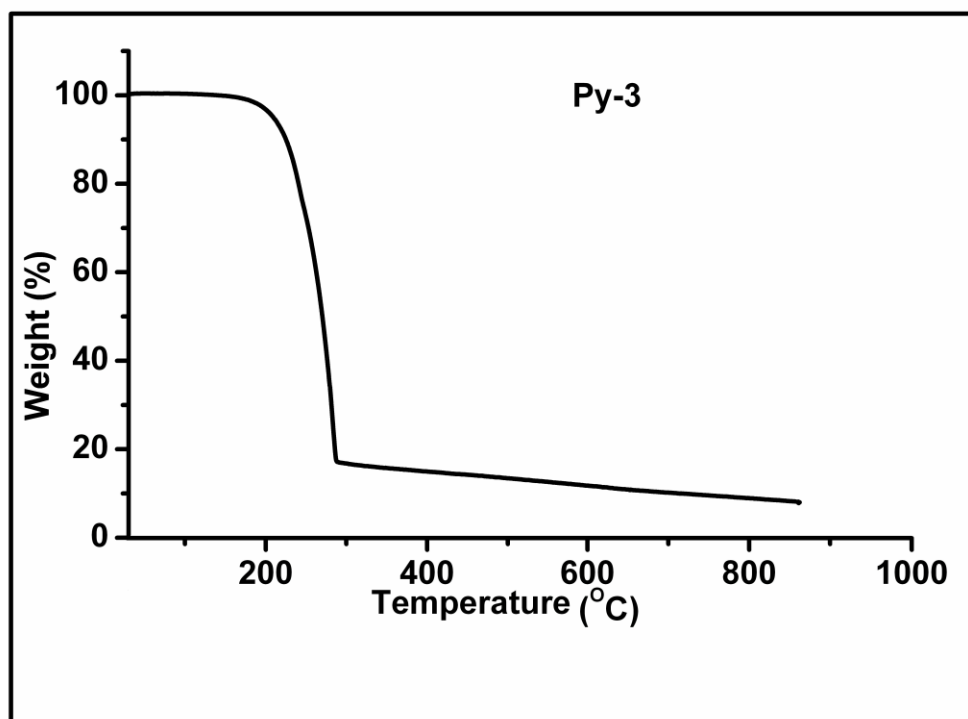

Figure S8. TGA thermograms of PY-1, PY-2 and PY-3.

Table 1. Electroluminescent quantum yield (ELQY) of PY-1, PY-2 and PY-3 based OLED devices using various conditions.

| <b>Device</b> | <b>Max. ELQY (%)</b> |
|---------------|----------------------|
| PY-1 (5 %)    | 2                    |
| PY-1 (10 %)   | 2                    |
| PY-1 (15 %)   | 0.7                  |
| PY-2 (40 nm)  | 0.04                 |
| PY-2 (45 nm)  | 0.06                 |
| PY-2 (50 nm)  | 0.02                 |
| PY-3 (40 nm)  | 0.1                  |
| PY-3 (45 nm)  | 0.07                 |
| PY-3 (50 nm)  | 0.1                  |
